# Supplementary material
Source: PubMed Central journal article supplement (PMC8640537)
Supplement: mmc1.pdf [file mmc1.pdf]

## **Supplemental material**

### **ANCA-associated Glomerulonephritis Developing Following the Pfizer-BioNTech COVID-19**

#### **Vaccine**

**Authors:** Geoffrey K. Dube<sup>1</sup>, Luke J. Benvenuto<sup>2</sup> and Ibrahim Batal<sup>3</sup>

## Supplemental References (S1-S7)

- S1. Eindhoven S, Levels J, Huisman M, et al. MPO-ANCA associated vasculitis with mononeuritis multiplex following influenza vaccination. *Allergy Asthma Clin Immunol.* 2017;13:49.
- S2. Sekar A, Campbell R, Tabarra J, et al. ANCA Glomerulonephritis Post Moderna COVID-19 Vaccination. *Kidney Int.* 2021.
- S3. Anderegg MA, Liu M, Saganas C, et al. De nov vasculitis after mRNA-1273 (Moderna) vaccination. *Kidney Int* 2021;100(2):474-476.
- S4. Shakoor MT, Birkenbach MP, Lynch M. ANCA-Associated Vasculitis Following the Pfizer-BioNTech COVID-19 Vaccine. *Am J Kid Dis* 2021.
- S5. Vlachoyiannopoulos PG, Magira E, Alexopoulos H, et al. Autoantibodies related to systemic autoimmune rheumatic diseases in severely ill patients with COVID-19. *Ann Rheum Dis.* 2020;79(12):1661-1663.
- S6. Sacchi MC, Tamiazzo S, Stobbione P, et al. SARS-CoV-2 infection as a trigger of autoimmune response. *Clin Transl Sci.* 2020.
- S7. Jeffs LS, Nitschke J, Tervaert JW, et al. Viral RNA in the influenza vaccine may have contributed to the development of ANCA-associated vasculitis in a patient following immunisation. *Clin Rheumatol.* 2016;35(4):943-951.
